# Supplementary material for: Maternal Food Restriction during Pregnancy and Lactation Adversely Affect Hepatic Growth and Lipid Metabolism in Three-Week-Old Rat Offspring
Source: PubMed Central journal article supplement (PMC5187915; doi:10.3390/ijms17122115), 2016-12-15
Supplement: ijms-17-02115-s001.pdf [file ijms-17-02115-s001.pdf]

# Supplementary Materials: Maternal Food Restriction during Pregnancy and Lactation Adversely Affect Hepatic Growth and Lipid Metabolism in 3-Week-Old Rat Offspring

Sangmi Lee, Young-Ah You, Eun Jin Kwon, Sung-Chul Jung, Inho Jo and Young Ju Kim

**Table S1.** Comparison of the expressions of hepatic growth related genes.

| Variables     | mRNA Expression |         |         |         | Protein Expression |         |         |         |
|---------------|-----------------|---------|---------|---------|--------------------|---------|---------|---------|
|               | ANOVA           |         | ANCOVA  |         | ANOVA              |         | ANCOVA  |         |
|               | F-Value         | p-Value | F-Value | p-Value | F-Value            | p-Value | F-Value | p-Value |
| AKT           | 0.068           | 0.935   | 0.137   | 0.875   | 1.360              | 0.326   | 0.697   | 0.541   |
| AMPK $\alpha$ | 8.983           | 0.016   | 6.445   | 0.041   | 6.513              | 0.031   | 4.340   | 0.081   |
| mTOR          | 17.138          | 0.003   | 8.983   | 0.022   | 21.001             | 0.002   | 11.087  | 0.015   |

Analysis of covariance was adjusted liver weight to body weight ratio.

**Table S2.** Comparison of the expressions of hepatic lipogenesis related genes.

| Variables    | mRNA Expression |         |         |         | Protein Expression |         |         |         |
|--------------|-----------------|---------|---------|---------|--------------------|---------|---------|---------|
|              | ANOVA           |         | ANCOVA  |         | ANOVA              |         | ANCOVA  |         |
|              | F-Value         | p-Value | F-Value | p-Value | F-Value            | p-Value | F-Value | p-Value |
| SREBP1       | 5.663           | 0.042   | 4.572   | 0.074   | 32.390             | 0.001   | 20.412  | 0.004   |
| ChREBP       | 6.842           | 0.028   | 2.809   | 0.152   | 0.900              | 0.455   | 0.815   | 0.494   |
| ACC $\alpha$ | 9.372           | 0.014   | 4.194   | 0.085   | 7.567              | 0.023   | 4.992   | 0.064   |
| FAS          | 9.614           | 0.013   | 5.176   | 0.061   | 24.210             | 0.001   | 12.525  | 0.011   |

Analysis of covariance was adjusted liver weight to body weight ratio.

**Table S3.** Chemical composition of Purina Lab. rodent chow.

| Nutrients           | Unit | Content | Nutrients             | Unit  | Content |
|---------------------|------|---------|-----------------------|-------|---------|
| Protein             | %    | 20.00   | Iodine                | ppm   | 1.42    |
| Arginine            | %    | 1.26    | Chromium              | ppm   | 0.00    |
| Cystine             | %    | 0.37    | Selenium              | ppm   | 0.32    |
| Glycine             | %    | 0.87    | -                     | -     | -       |
| Histidine           | %    | 0.50    | Vitamins              | -     | -       |
| Isoleucine          | %    | 0.82    | Vitamin K             | ppm   | 6.69    |
| Leucine             | %    | 1.47    | Thyamin Hydrichloride | ppm   | 11.02   |
| Lysine              | %    | 1.01    | Riboflavin            | ppm   | 11.57   |
| Methionine          | %    | 0.33    | Niacin                | ppm   | 217.70  |
| Phenylalanine       | %    | 0.98    | Pantothenic Acid      | ppm   | 88.72   |
| Tyrosine            | %    | 0.63    | Choline Chloride      | ppm   | 3447.96 |
| Threonine           | %    | 0.72    | Folic Acid            | ppm   | 13.60   |
| Tryptophan          | %    | 0.25    | Pyridoxine            | ppm   | 11.00   |
| Valine              | %    | 0.91    | Biotin                | ppm   | 0.15    |
| -                   | -    | -       | B12                   | ppm   | 41.00   |
| Fat (ether extract) | -    | 4.50    | Vitamin A             | IU/g  | 28.03   |
| Linoleic Acid       | %    | 1.10    | Vitamin D3 (added)    | IU/g  | 4.00    |
| Linolenic Acid      | %    | 0.12    | Vitamin E             | IU/kg | 100.00  |
| Arachidonic Acid    | %    | 0.02    | -                     | -     | -       |
| Omega-3 Fatty Acids | %    | 1.11    | -                     | -     | -       |
| -                   | -    | -       | -                     | -     | -       |

**Table S3.** *Cont.*

| Nutrients                | Unit | Content | Nutrients                                               | Unit | Content |
|--------------------------|------|---------|---------------------------------------------------------|------|---------|
| Fiber (Crude)            | %    | 6.00    | –                                                       | –    | –       |
| Minerals                 | –    | –       | –                                                       | –    | –       |
| Ash                      | %    | 7.25    | –                                                       | –    | –       |
| Calcium                  | %    | 1.20    | –                                                       | –    | –       |
| Phosphorus               | %    | 0.62    | –                                                       | –    | –       |
| Phosphorus (non-phytate) | %    | 0.40    | –                                                       | –    | –       |
| Potassium                | %    | 0.82    | Calories Provided by:                                   | –    | –       |
| Magnesium                | %    | 0.16    | Protein                                                 | %    | 24.52   |
| Sulfur                   | %    | 0.22    | Fat (ether extract)                                     | %    | 12.41   |
| Sodium                   | %    | 0.34    | Carbohydrates                                           | %    | 63.07   |
| Chloride                 | %    | 0.47    | –                                                       | –    | –       |
| Fluorine                 | ppm  | 21.38   |                                                         |      |         |
| Iron                     | ppm  | 112.93  |                                                         |      |         |
| Zinc                     | ppm  | 128.85  | * Nutrients expressed as percent of ration except where |      |         |
| Manganese                | ppm  | 95.49   | otherwise indicated. Moisture content is assumed to be  |      |         |
| Copper                   | ppm  | 22.74   | 10% for the purpose of calculations.                    |      |         |
| Cobalt                   | ppm  | 0.76    |                                                         |      |         |

**Table S4.** List of primers used in this study.

| Genes                          | Primer Category | Primer Sequence (5' → 3')  |
|--------------------------------|-----------------|----------------------------|
| <i>AKT</i>                     | Forward         | GGT GAT CCT GGT GAA GGA GA |
|                                | Reverse         | TTG GCG TAC TCC ATG ACA AA |
| <i>AMPK<math>\alpha</math></i> | Forward         | TGC ACA CAT GAA TGC AAA GA |
|                                | Reverse         | GAG TTC CAC ACA GCA AAG CA |
| <i>mTOR</i>                    | Forward         | AGC CGT TGT TGC AGA GAC TT |
|                                | Reverse         | CAT GGT TCA TGG TGT CTT GC |
| <i>SREBP1</i>                  | Forward         | GTA CCT GCG GGA CAG ATT AG |
|                                | Reverse         | TCA GGT CAT GTT GGA AAC AC |
| <i>ChREBP</i>                  | Forward         | GCA TCC TCA TCC GAC CTT TA |
|                                | Reverse         | AGA GCA GGC AGG GAA CAG TA |
| <i>FAS</i>                     | Forward         | TGG CTT CCG TTC AGT CTC TT |
|                                | Reverse         | CAG TGC CAA GGT CTC TAG CC |
| <i>ACC<math>\alpha</math></i>  | Forward         | AAA GTC CTT GGT CGG GAA GT |
|                                | Reverse         | TGT GGG AAC AAA CTC GAT GA |
